# Supplementary material
Source: publisher figshare collection journal article supplement (https://future-science-group.figshare.com/ndownloader/files/29013741)
Supplement: Supplementary file 1 [file 29013741]

Supplement Table 1 The expression of genes in moning and evening

| **gene** | **time** | **2^-△△Ct** | **P Value** |
| --- | --- | --- | --- |
| HIF-1α | D11-morning | 34.1±3.1 | 0.0009 |
|  | D11-evening | 14.4±2.4 |  |
|  | D12-morning | 2.5±0.1 | 0.007 |
|  | D12-evening | 35.4±4.7 |  |
|  | D16-morning | 17.2±1.1 | 0.003 |
|  | D16-evening | 29.1±3 |  |
|  | D18-morning | 1.5±0.4 | 0.367 |
|  | D18-evening | 1.2±0.5 |  |
| VEGF | D12-morning | 0.76±0.16 | <0.0001 |
|  | D12-evening | 8.9±0.4 |  |
|  | D16-morning | 4.3±0.2 | 0.003 |
|  | D16-evening | 6.2±0.5 |  |
| SOX-2 | D10-morning | 0.07±0.004 | 0.0003 |
|  | D10-evening | 0.4±0.05 |  |
|  | D11-morning | 0.07±0.01 | 0.001 |
|  | D11-evening | 0.3±0.03 |  |
|  | D18-morning | 0.2±0.01 | 0.029 |
|  | D18-evening | 0.26±0.02 |  |
| M1 | D10-morning | 0.2±0.01 | <0.0001 |
|  | D10-evening | 2.9±0.27 |  |
|  | D11-morning | 1±0.05 | 0.003 |
|  | D11-evening | 1.4±0.09 |  |
| M2 | D10-morning | 0.4±0.2 | 0.035 |
|  | D10-evening | 1.5±0.6 |  |
| M3 | D10-morning | 0.39±0.06 | 0.013 |
|  | D10-evening | 0.88±0.19 |  |
|  | D11-morning | 0.06±0.004 | 0.004 |
|  | D11-evening | 0.36±0.09 |  |
|  | D12-morning | 0.2±0.01 | 0.0003 |
|  | D12-evening | 0.06±0.02 |  |
|  | D16-morning | 0.13±0.003 | 0.0004 |
|  | D16-evening | 0.07±0.009 | |
|  | D18-morning | 0.9±0.07 | 0.0003 |
|  | D18-evening | 0.4±0.03 |  |
| VAChT | D11-morning | 0.25±0.05 | 0.009 |
|  | D11-evening | 0.56±0.11 |  |
|  | D12-morning | 0.61±0.12 | 0.001 |
|  | D12-evening | 0.03±0.007 | |
|  | D16-morning | 0.15±0.03 | 0.01 |
|  | D16-evening | 0.07±0.016 | |
| CHE | D12-morning | 2.24±1.8 | 0.028 |
|  | D12-evening | 0.43±0.17 |  |
